# Supplementary material for: Hybrid Pectin-Liposome Formulation against Multi-Resistant Bacterial Strains
Source: PubMed Central journal article supplement (PMC7465986; doi:10.3390/pharmaceutics12080769), 2020-08-14
Supplement: pharmaceutics-12-00769-s001.pdf [file pharmaceutics-12-00769-s001.pdf]

# Supplementary Materials: Hybrid Pectin-Liposome Formulation against Multi-Resistant Bacterial Strains

Lígia Nunes de Moraes Ribeiro \*, Eneida de Paula, Daise Aparecida Rossi, Guilherme Paz Monteiro, Edson Campos Valadares Júnior, Rogério Reis Silva, Rodrigo Franco, Foued Salmen Espíndola, Luiz Ricardo Goulart and Belchiolina Beatriz Fonseca

## Introduction

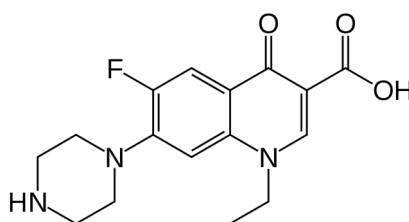

**Figure S1.** Chemical structure of norfloxacin,  $C_{16}H_{18}FN_3O_3$ , Molecular Weight 319.33 g/mol.

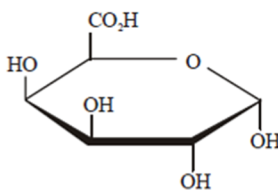

**Figure S2.** Chemical structure of pectin monomer,  $C_6H_{10}O_7$ , Molecular Weight 194.14 g/mol.

## Methods

### *In vivo* Toxicity Assays in Chicken Embryo Model

#### Pilot Test

A total of 75 eggs were used to inoculate different doses of *Salmonella* Heidelberg (1, 2, 3 and  $5_{\log}$ CFU/embryo) on CAM ( $n = 5$ ), to verify the minimum bacterial concentration that kill the embryos with different ED (8, 10 and 14) (table S1). The embryo mortality was evaluated after 24 and 48 h by ovoscopy. In this test, the minimum amount of *Salmonella* that kill the chicken embryo was  $2_{\log}$ UFC/embryo. Therefore,  $2_{\log}$ UFC/embryo of ED 8 and 10 were employed in the subsequent analyses.

Then, it was determined the lowest dose of NOR (2, 20 or 50  $\mu$ g/embryo) capable of saving the embryo after 1 h of *Salmonella* infection (table S2). ED10 embryos whit 20  $\mu$ g/embryo NOR were selected to carried out the toxicity test.

**Table S1.** Mathematical modeling of Kinetic curves from the samples according to the determination coefficient ( $R^2$ ) values.

| Formulations | 0 Order | First Order | Higuchi | Korsmeyer-Peppas | Weibull |
|--------------|---------|-------------|---------|------------------|---------|
| LIP/NOR      | 0.76    | 0.66        | 0.49    | 0.94             | 0.79    |
| PCT-LIP/NOR  | 0.88    | 0.77        | 0.69    | 0.98             | 0.60    |
| PCT@LIP/NOR  | 0.63    | 0.93        | 0.81    | 0.86             | 0.46    |

Note: LIP/NOR = liposome encapsulating (0.2%) NOR, PCT-LIP = liposome encapsulating (0.2%) NOR blended with pectin solution and PCT@LIP = pectin-liposome formulation containing (0.2%) NOR,  $n = 5$ .

**Table S2.** Number of surviving embryos (after 24 and 48 h) infected (via CAM) with different concentrations of *Salmonella* Heidelberg, on ED 8, 10 and 14.

| ED | <i>Salmonella</i> Heidelberg (logCFU/embryo) |      |      |      |      |      |      |      |      |      |
|----|----------------------------------------------|------|------|------|------|------|------|------|------|------|
|    | NC                                           |      | 2    |      | 3    |      | 4    |      | 5    |      |
|    | 24 h                                         | 48 h | 24 h | 48 h | 24 h | 48 h | 24 h | 48 h | 24 h | 48 h |
| 8  | 5                                            | 5    | 5    | 5    | 5    | 5    | 5    | 5    | 5    | 5    |
| 10 | 5                                            | 5    | 0    | 5    | 0    | 5    | 0    | 5    | 0    | 5    |
| 14 | 5                                            | 5    | 5    | 5    | 5    | 5    | 5    | 5    | 5    | 5    |

Note: NC – Negative control, eggs treated with deionized water; ED - embryos days old.

**Table S3.** Number of surviving embryos (after 48 h) infected (via CAM) with different concentrations of *Salmonella* Heidelberg, on ED 8 and10, treated or not with NOR (2, 20 and 50 µg/embryos).

| ED | NC | Sal | NOR 2 | NOR 20 | NOR 50 | Sal/NOR 2 | Sal/NOR 20 | Sal/NOR 50 |
|----|----|-----|-------|--------|--------|-----------|------------|------------|
| 8  | 5  | 0   | 0     | 0      | 0      | 0         | 0          | 0          |
| 10 | 5  | 0   | 5     | 5      | 5      | 0         | 5          | 5          |

Note: NC: negative control, eggs treated with water; Sal: positive control, inoculation with *Salmonella*; NOR 2: eggs treated with 2 µg/embryo norfloxacin; NOR 20: 20µg/embryo norfloxacin; NOR 50: 50µg/embryo norfloxacin; Sal/NOR 2: eggs inoculated with 2<sub>log</sub>UFC Sal and treated with 2µg/embryo NOR after 1 h; Sal/NOR 20: eggs inoculated with 2<sub>log</sub>UFC Sal and treated with 20µg/embryo after 1 h; Sal/NOR 50: eggs inoculated with 2<sub>log</sub>UFC Sal and treated with 50µg/embryo after 1h.
